# Supplementary material for: C2C12 Mouse Myoblasts Damage Induced by Oxidative Stress Is Alleviated by the Antioxidant Capacity of the Active Substance Phloretin
Source: PubMed Central journal article supplement (PMC7516399; doi:10.3389/fcell.2020.541260), 2020-09-11
Supplement: Image_1.pdf [file Image_1.pdf]

## Supplementary Figures

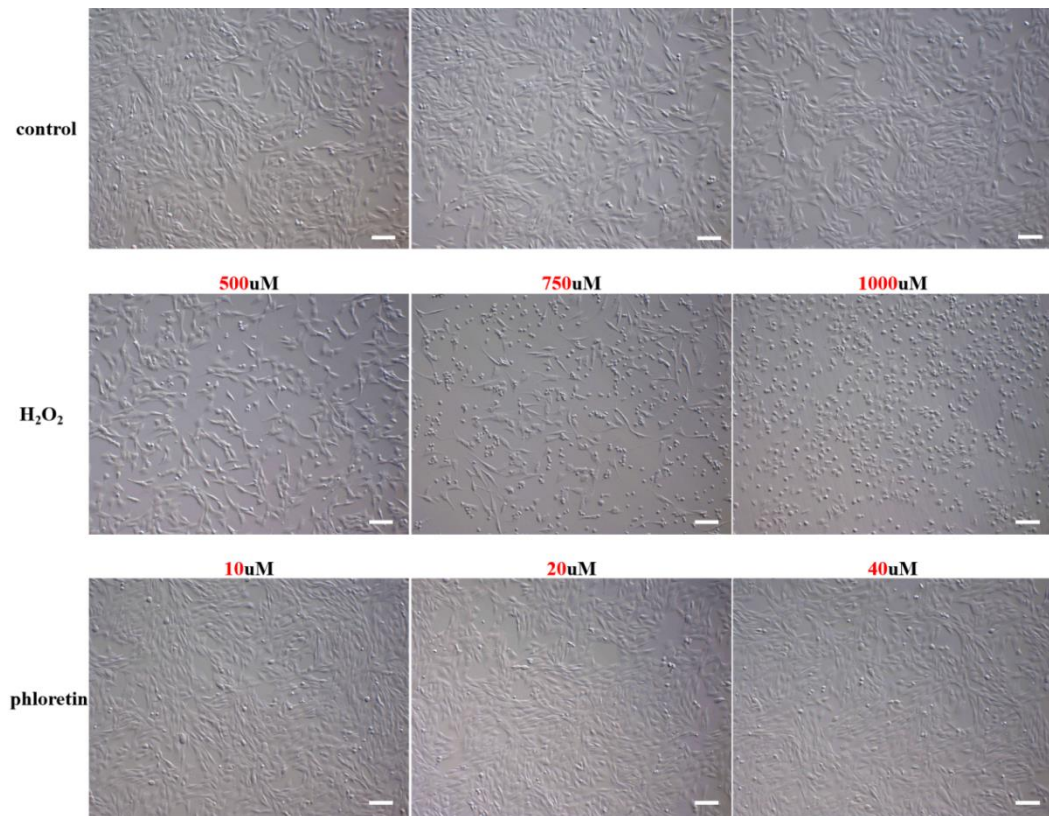

(B)

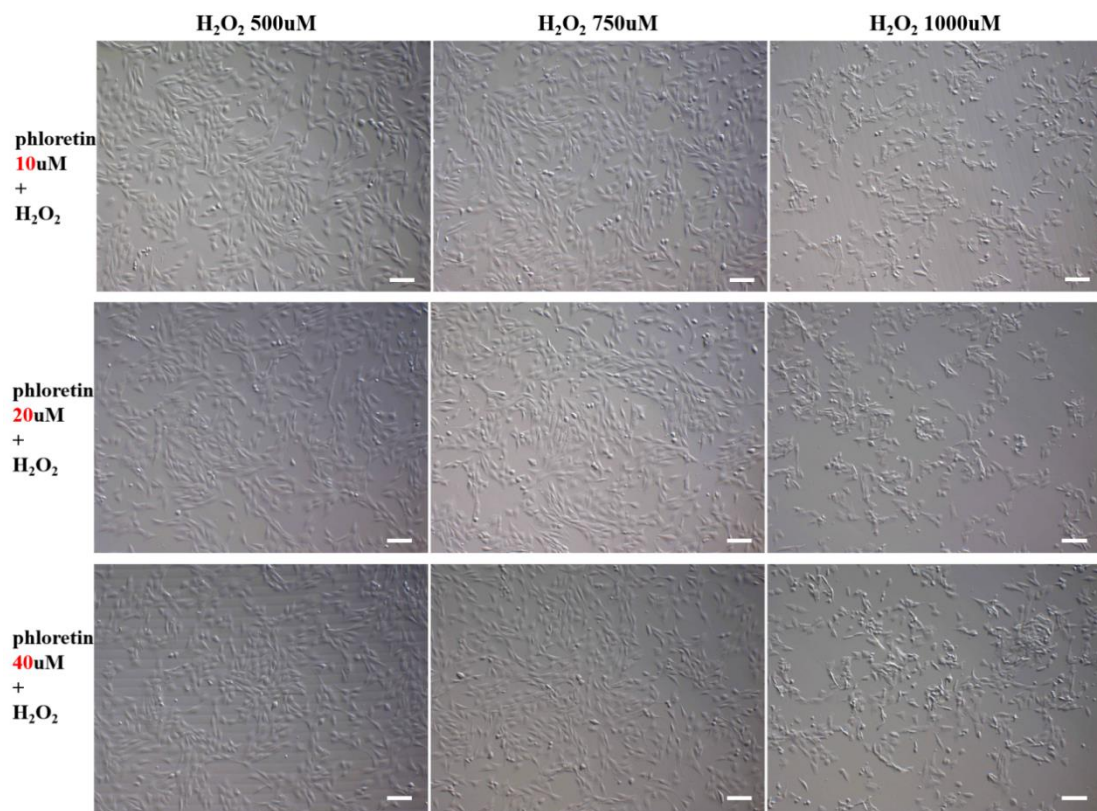

**Figure S1. Morphology and numbers of C2C12 cells after supplementation of phloretin and H<sub>2</sub>O<sub>2</sub> with various concentrations in different groups.** Note: scale bar= 100 μm. “\*\*” means significant difference with  $P < 0.05$ .

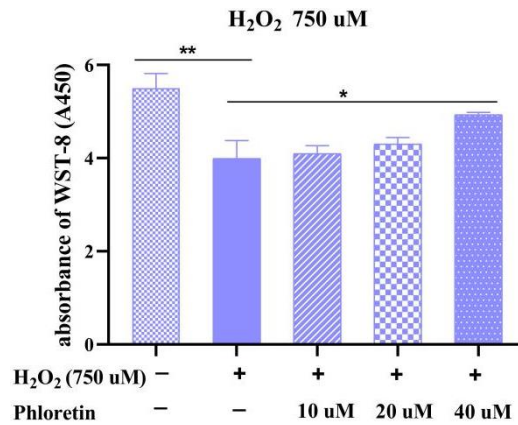

**Figure S2. ROS level of C2C12 cells under induction with 750 μmol/L H<sub>2</sub>O<sub>2</sub> in different groups.** Note: “\*\*\*” “\*\*” represent great significant difference ( $P < 0.01$ ) and significant difference ( $P < 0.05$ ), respectively.

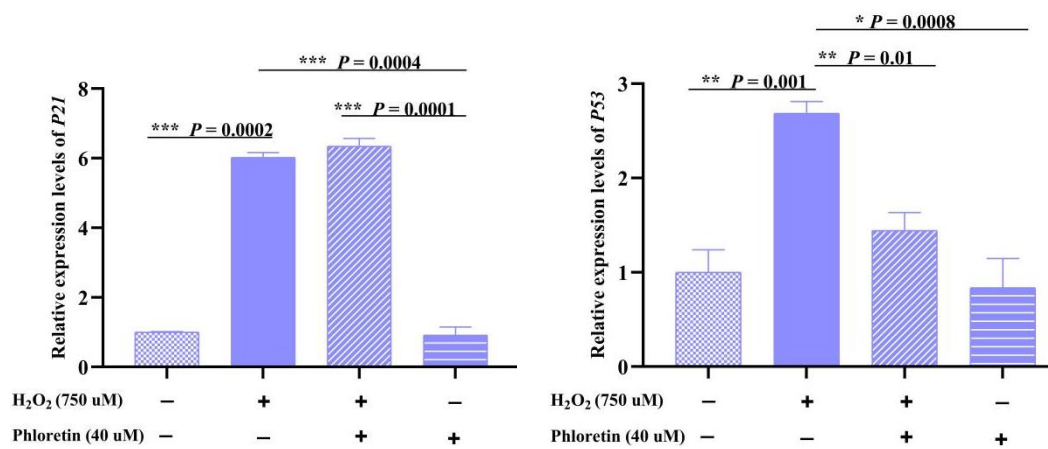

**Figure S3. The relative expression levels of P21 and P53 genes in different treatment groups (under induction with 750 μmol/L H<sub>2</sub>O<sub>2</sub>).** Note: “\*\*\*” “\*\*” represent great significant difference ( $P < 0.01$ ) and significant difference ( $P < 0.05$ ), respectively.
